# Supplementary material for: Computer-assisted Medical Decision-making System for Diagnosis of Urticaria
Source: PubMed Central journal article supplement — MDM Policy Pract. 2016 Nov 9;1(1):2381468316677752. doi: 10.1177/2381468316677752 (PMC6125052; doi:10.1177/2381468316677752), 2016-11-09
Supplement: DS_10.1177_2381468316677752.pdf [file DS_10.1177_2381468316677752.pdf]

Appendix. Results of 10 Independent Runs of 10-Fold Cross Validation over IDST Data

| Key_Run | Key_Fold | CBA       | SVM       | DT        | NB        | MLP       | kNN       |
|---------|----------|-----------|-----------|-----------|-----------|-----------|-----------|
| 1       | 1        | 94.230769 | 94.230769 | 98.076923 | 96.153846 | 96.153846 | 96.153846 |
| 1       | 2        | 94.230769 | 92.307692 | 96.153846 | 92.307692 | 90.384615 | 90.384615 |
| 1       | 3        | 92.307692 | 88.461538 | 96.153846 | 90.384615 | 88.461538 | 88.461538 |
| 1       | 4        | 92.307692 | 90.384615 | 94.230769 | 94.230769 | 94.230769 | 96.153846 |
| 1       | 5        | 96.153846 | 94.230769 | 94.230769 | 96.153846 | 96.153846 | 92.307692 |
| 1       | 6        | 94.230769 | 84.615385 | 96.153846 | 94.230769 | 86.538462 | 94.230769 |
| 1       | 7        | 94.230769 | 96.153846 | 94.230769 | 96.153846 | 94.230769 | 94.230769 |
| 1       | 8        | 96.153846 | 90.384615 | 92.307692 | 98.076923 | 94.230769 | 96.153846 |
| 1       | 9        | 92.156863 | 86.27451  | 92.156863 | 94.117647 | 86.27451  | 90.196078 |
| 1       | 10       | 96.078431 | 94.117647 | 94.117647 | 94.117647 | 92.156863 | 94.117647 |
| 2       | 1        | 84.615385 | 92.307692 | 90.384615 | 90.384615 | 88.461538 | 88.461538 |
| 2       | 2        | 98.076923 | 90.384615 | 96.153846 | 96.153846 | 92.307692 | 92.307692 |
| 2       | 3        | 94.230769 | 92.307692 | 92.307692 | 94.230769 | 90.384615 | 94.230769 |
| 2       | 4        | 92.307692 | 92.307692 | 94.230769 | 92.307692 | 86.538462 | 92.307692 |
| 2       | 5        | 96.153846 | 94.230769 | 96.153846 | 98.076923 | 96.153846 | 96.153846 |
| 2       | 6        | 92.307692 | 90.384615 | 94.230769 | 94.230769 | 90.384615 | 96.153846 |
| 2       | 7        | 96.153846 | 90.384615 | 96.153846 | 94.230769 | 92.307692 | 98.076923 |
| 2       | 8        | 92.307692 | 94.230769 | 92.307692 | 92.307692 | 94.230769 | 92.307692 |
| 2       | 9        | 96.078431 | 92.156863 | 96.078431 | 96.078431 | 90.196078 | 90.196078 |
| 2       | 10       | 100       | 96.078431 | 100       | 100       | 98.039216 | 98.039216 |
| 3       | 1        | 98.076923 | 96.153846 | 100       | 100       | 98.076923 | 98.076923 |
| 3       | 2        | 94.230769 | 94.230769 | 96.153846 | 100       | 96.153846 | 100       |
| 3       | 3        | 88.461538 | 90.384615 | 90.384615 | 92.307692 | 90.384615 | 88.461538 |
| 3       | 4        | 98.076923 | 90.384615 | 92.307692 | 98.076923 | 92.307692 | 94.230769 |
| 3       | 5        | 96.153846 | 94.230769 | 98.076923 | 90.384615 | 92.307692 | 90.384615 |
| 3       | 6        | 90.384615 | 90.384615 | 90.384615 | 90.384615 | 92.307692 | 94.230769 |
| 3       | 7        | 94.230769 | 92.307692 | 94.230769 | 98.076923 | 88.461538 | 94.230769 |
| 3       | 8        | 94.230769 | 94.230769 | 92.307692 | 94.230769 | 94.230769 | 94.230769 |
| 3       | 9        | 94.117647 | 94.117647 | 98.039216 | 92.156863 | 92.156863 | 94.117647 |
| 3       | 10       | 90.196078 | 92.156863 | 96.078431 | 94.117647 | 94.117647 | 94.117647 |
| 4       | 1        | 98.076923 | 96.153846 | 98.076923 | 98.076923 | 98.076923 | 96.153846 |
| 4       | 2        | 90.384615 | 88.461538 | 94.230769 | 92.307692 | 86.538462 | 92.307692 |
| 4       | 3        | 96.153846 | 94.230769 | 94.230769 | 98.076923 | 94.230769 | 94.230769 |
| 4       | 4        | 96.153846 | 96.153846 | 94.230769 | 96.153846 | 94.230769 | 94.230769 |
| 4       | 5        | 94.230769 | 88.461538 | 90.384615 | 90.384615 | 88.461538 | 92.307692 |
| 4       | 6        | 98.076923 | 94.230769 | 98.076923 | 98.076923 | 94.230769 | 98.076923 |
| 4       | 7        | 96.153846 | 94.230769 | 94.230769 | 96.153846 | 92.307692 | 92.307692 |
| 4       | 8        | 92.307692 | 92.307692 | 92.307692 | 96.153846 | 92.307692 | 92.307692 |
| 4       | 9        | 92.156863 | 92.156863 | 94.117647 | 96.078431 | 92.156863 | 98.039216 |
| 4       | 10       | 86.27451  | 84.313725 | 90.196078 | 86.27451  | 88.235294 | 90.196078 |
| 5       | 1        | 88.461538 | 90.384615 | 86.538462 | 94.230769 | 92.307692 | 94.230769 |
| 5       | 2        | 96.153846 | 94.230769 | 94.230769 | 94.230769 | 92.307692 | 90.384615 |

Appendix. Results of 10 Independent Runs of 10-Fold Cross Validation over IDST Data

|   |    |           |           |           |           |           |           |
|---|----|-----------|-----------|-----------|-----------|-----------|-----------|
| 5 | 3  | 94.230769 | 92.307692 | 94.230769 | 94.230769 | 96.153846 | 94.230769 |
| 5 | 4  | 94.230769 | 94.230769 | 94.230769 | 96.153846 | 90.384615 | 94.230769 |
| 5 | 5  | 92.307692 | 94.230769 | 94.230769 | 92.307692 | 92.307692 | 90.384615 |
| 5 | 6  | 96.153846 | 94.230769 | 98.076923 | 96.153846 | 96.153846 | 94.230769 |
| 5 | 7  | 92.307692 | 94.230769 | 94.230769 | 98.076923 | 100       | 96.153846 |
| 5 | 8  | 94.230769 | 88.461538 | 94.230769 | 92.307692 | 88.461538 | 92.307692 |
| 5 | 9  | 96.078431 | 92.156863 | 96.078431 | 94.117647 | 94.117647 | 94.117647 |
| 5 | 10 | 96.078431 | 92.156863 | 96.078431 | 96.078431 | 92.156863 | 94.117647 |
| 6 | 1  | 96.153846 | 92.307692 | 94.230769 | 94.230769 | 92.307692 | 90.384615 |
| 6 | 2  | 92.307692 | 92.307692 | 86.538462 | 94.230769 | 90.384615 | 92.307692 |
| 6 | 3  | 94.230769 | 94.230769 | 96.153846 | 96.153846 | 92.307692 | 96.153846 |
| 6 | 4  | 94.230769 | 92.307692 | 96.153846 | 96.153846 | 94.230769 | 96.153846 |
| 6 | 5  | 94.230769 | 94.230769 | 94.230769 | 96.153846 | 96.153846 | 94.230769 |
| 6 | 6  | 94.230769 | 94.230769 | 90.384615 | 90.384615 | 92.307692 | 92.307692 |
| 6 | 7  | 90.384615 | 90.384615 | 92.307692 | 92.307692 | 90.384615 | 90.384615 |
| 6 | 8  | 98.076923 | 92.307692 | 100       | 96.153846 | 96.153846 | 94.230769 |
| 6 | 9  | 96.078431 | 90.196078 | 98.039216 | 98.039216 | 90.196078 | 98.039216 |
| 6 | 10 | 92.156863 | 94.117647 | 94.117647 | 94.117647 | 98.039216 | 90.196078 |
| 7 | 1  | 94.230769 | 94.230769 | 96.153846 | 92.307692 | 92.307692 | 92.307692 |
| 7 | 2  | 92.307692 | 96.153846 | 92.307692 | 92.307692 | 96.153846 | 92.307692 |
| 7 | 3  | 94.230769 | 98.076923 | 98.076923 | 96.153846 | 98.076923 | 94.230769 |
| 7 | 4  | 92.307692 | 88.461538 | 92.307692 | 94.230769 | 90.384615 | 96.153846 |
| 7 | 5  | 98.076923 | 96.153846 | 98.076923 | 98.076923 | 98.076923 | 96.153846 |
| 7 | 6  | 96.153846 | 88.461538 | 92.307692 | 94.230769 | 90.384615 | 94.230769 |
| 7 | 7  | 96.153846 | 92.307692 | 96.153846 | 94.230769 | 94.230769 | 90.384615 |
| 7 | 8  | 92.307692 | 86.538462 | 92.307692 | 92.307692 | 82.692308 | 92.307692 |
| 7 | 9  | 94.117647 | 94.117647 | 96.078431 | 98.039216 | 90.196078 | 94.117647 |
| 7 | 10 | 92.156863 | 90.196078 | 94.117647 | 96.078431 | 90.196078 | 92.156863 |
| 8 | 1  | 94.230769 | 94.230769 | 96.153846 | 96.153846 | 96.153846 | 96.153846 |
| 8 | 2  | 90.384615 | 96.153846 | 96.153846 | 94.230769 | 94.230769 | 98.076923 |
| 8 | 3  | 96.153846 | 92.307692 | 94.230769 | 96.153846 | 90.384615 | 92.307692 |
| 8 | 4  | 92.307692 | 88.461538 | 90.384615 | 94.230769 | 90.384615 | 86.538462 |
| 8 | 5  | 98.076923 | 96.153846 | 96.153846 | 98.076923 | 92.307692 | 96.153846 |
| 8 | 6  | 98.076923 | 88.461538 | 92.307692 | 92.307692 | 94.230769 | 92.307692 |
| 8 | 7  | 92.307692 | 92.307692 | 88.461538 | 90.384615 | 90.384615 | 96.153846 |
| 8 | 8  | 96.153846 | 90.384615 | 96.153846 | 98.076923 | 94.230769 | 96.153846 |
| 8 | 9  | 90.196078 | 86.27451  | 90.196078 | 92.156863 | 88.235294 | 86.27451  |
| 8 | 10 | 94.117647 | 96.078431 | 92.156863 | 96.078431 | 88.235294 | 98.039216 |
| 9 | 1  | 94.230769 | 94.230769 | 94.230769 | 92.307692 | 92.307692 | 90.384615 |
| 9 | 2  | 96.153846 | 96.153846 | 98.076923 | 98.076923 | 96.153846 | 100       |
| 9 | 3  | 92.307692 | 96.153846 | 94.230769 | 94.230769 | 90.384615 | 94.230769 |
| 9 | 4  | 94.230769 | 90.384615 | 92.307692 | 96.153846 | 92.307692 | 94.230769 |
| 9 | 5  | 90.384615 | 90.384615 | 96.153846 | 90.384615 | 94.230769 | 90.384615 |

Appendix. Results of 10 Independent Runs of 10-Fold Cross Validation over IDST Data

|    |            |                 |            |                |                 |                |            |
|----|------------|-----------------|------------|----------------|-----------------|----------------|------------|
| 9  | 6          | 92.307692       | 90.384615  | 96.153846      | 96.153846       | 90.384615      | 92.307692  |
| 9  | 7          | 92.307692       | 94.230769  | 98.076923      | 94.230769       | 92.307692      | 94.230769  |
| 9  | 8          | 98.076923       | 98.076923  | 100            | 98.076923       | 98.076923      | 98.076923  |
| 9  | 9          | 92.156863       | 92.156863  | 94.117647      | 90.196078       | 90.196078      | 94.117647  |
| 9  | 10         | 98.039216       | 96.078431  | 98.039216      | 96.078431       | 98.039216      | 94.117647  |
| 10 | 1          | 88.461538       | 92.307692  | 92.307692      | 92.307692       | 92.307692      | 94.230769  |
| 10 | 2          | 94.230769       | 96.153846  | 98.076923      | 98.076923       | 92.307692      | 94.230769  |
| 10 | 3          | 94.230769       | 94.230769  | 96.153846      | 96.153846       | 94.230769      | 92.307692  |
| 10 | 4          | 96.153846       | 88.461538  | 96.153846      | 96.153846       | 90.384615      | 98.076923  |
| 10 | 5          | 94.230769       | 94.230769  | 92.307692      | 94.230769       | 92.307692      | 94.230769  |
| 10 | 6          | 92.307692       | 88.461538  | 92.307692      | 94.230769       | 90.384615      | 92.307692  |
| 10 | 7          | 96.153846       | 90.384615  | 96.153846      | 92.307692       | 92.307692      | 90.384615  |
| 10 | 8          | 98.076923       | 88.461538  | 98.076923      | 96.153846       | 92.307692      | 96.153846  |
| 10 | 9          | 96.078431       | 98.039216  | 98.039216      | 96.078431       | 96.078431      | 96.078431  |
| 10 | 10         | 92.156863       | 90.196078  | 90.196078      | 94.117647       | 92.156863      | 94.117647  |
|    | <b>AVG</b> | 94.1108595<br>4 | 92.4313723 | 94.595776<br>6 | 96.153846       | 92.565610<br>7 | 93.7835594 |
|    | <b>MAX</b> | 100             | 98.076923  | 100            | 100             | 100            | 100        |
|    | <b>MIN</b> | 84.615385       | 84.313725  | 86.538462      | 86.27451        | 82.692308      | 86.27451   |
|    | <b>SD</b>  | 2.76053003<br>8 | 2.96397831 | 2.8014054<br>2 | 2.61113827<br>8 | 3.1788396<br>9 | 2.79552812 |
